# Supplementary material
Source: PubMed Central journal article supplement (PMC3028919)
Supplement: supp_85_4_1528__1.pdf [file supp_85_4_1528__1.pdf]

1 **Vladimir Majerciak, et al. JVI101709-10**

2 **SUPPLEMENTAL FIGURES AND FIGURE LEGENDS**

3 **FIG. S1.** Relative levels of exogenous RBM15-FLAG vs endogenous RBM15 in HEK293 cells.  
4 HEK293 cells were transfected with increasing amounts of pRBM15-FLAG plasmid DNA. The  
5 expression levels of exogenous (1) vs endogenous RBM15 (2) in the transfected cells were  
6 determined by Western blot using anti-RBM15 antibody (A) and each graph (B) indicates  
7 changes in protein band intensity as a function of increasing RBM15-FLAG concentrations.

8 **FIG. S2.** ORF57, but not RBM15, stabilizes polyadenylated ORF59 RNA. RNA decay analysis  
9 of ORF59 mRNA in the presence or absence of ORF57 (A) or RBM15 (B) was determined by  
10 qRT-PCR on polyadenylated RNA following actinomycin D (ActD) treatment for the time points  
11 shown in (A) and (B). HEK 293 cells were transfected with plasmids expressing ORF59 plus  
12 ORF57 (A), RBM15 (B) or an empty FLAG vector control (A and B). Eighteen hours after  
13 transfection, 10 ug/ml of ActD was added to stop transcription and polyadenylated RNA samples  
14 were prepared at the designated time points post ActD treatment. The amounts of ORF59 and  
15 GAPDH RNAs in these samples were quantified by RT-PCR followed by qPCR using Taqman  
16 probes. ORF59 was quantified relative to GAPDH and expressed in percentage (%) of remaining  
17 mRNA after ActD treatment. Half life of ORF59 RNA was calculated by regression analysis.

18 **FIG. S3.** Overexpression of RBM15 promotes the expression of ORF57 mt2+3 and induces  
19 nuclear accumulation of the mt ORF57 RNA. (A) RBM15 preferentially increases nuclear  
20 accumulation of the ORF57 mt2+3 RNA, but not a wt ORF57 RNA. HEK293 cells were

21 cotransfected with wild type (wt) or mutated (mt2+3) ORF57 (100 ng) together with with or  
22 without 20 ng of an empty FLAG vector (-) or an RBM15 expressing vector. Twenty four hours  
23 after transfection, fractionated nuclear and cytoplasmic RNAs were prepared and analyzed by  
24 Northern blotting with GAPDH RNA as a loading control. U6 served as an indication of  
25 fractionation efficiency. Bar graphs are relative ORF57 RNA levels from each lane after being  
26 normalized to GAPGD RNA, with normalized C/N ratios of ORF57 RNA levels over the  
27 GAPDH RNA above the bar graphs. (B) Overexpressed RBM15 preferentially promotes the  
28 production of ORF57 mt2+3 than wt ORF57 at a higher dose (100 ng) of transfection in HEK293  
29 cells. Protein levels of both wt and mt ORF57-FLAG in cotransfection of HEK293 cells with 20  
30 ng RBM15 were examined by Western blotting.

31 **FIG. S4. RBM15 and OTT3 interact with ORF57, but not with Ref1-II. HEK293 cells were co-**  
32 **transfected with RBM15-or-OTT3-FLAG and either ORF57-HA or Ref1-II-HA. Co-**  
33 **immunoprecipitation was performed under physiological conditions as described in Fig. 8B.**  
34 **Under physiological conditions, RBM15 and OTT3 are shown to co-immunoprecipitate with**  
35 **ORF57, but not with the export cofactor Ref1-II.**

36

37
